# Supplementary material for: Tunable internal structure carbon sphere synthesis driven by water-solubility and its application in gas separation
Source: Royal Society of Chemistry journal article supplement (doi:10.1039/d3ra08430b), 2024-01-01
Supplement: d3ra08430b1.pdf [file d3ra08430b1.pdf]

## Supporting Information

### **A steerable internal structure carbon sphere synthesized driven by water-solubility and its application in gas separation**

*Yaqi Yao<sup>a,b</sup>, Hongying Zhuo<sup>a\*</sup>, Jinming Xu<sup>a\*</sup>, Xiaofeng Yang<sup>a</sup>, Yanqiang Huang*

*a\**

<sup>a</sup> State Key Laboratory of Catalysis, Dalian Institute of Chemical Physics,  
Chinese Academy of Sciences, No, 457 Zhongshan Road, Dalian 116023, China.

<sup>b</sup> University of Chinese Academy of Sciences, Beijing 100049, China.

\*Corresponding authors

E-mail: [zhuohongying@dicp.ac.cn](mailto:zhuohongying@dicp.ac.cn); [xujm@dicp.ac.cn](mailto:xujm@dicp.ac.cn); [yqhuang@dicp.ac.cn](mailto:yqhuang@dicp.ac.cn)

## Supplementary Figures

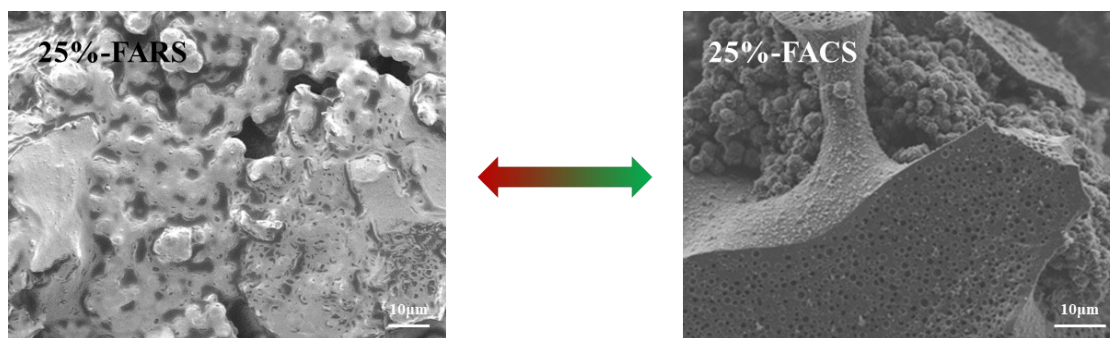

Fig. S1. SEM images of 25%-FARS without calcination and 25%-FACS sample

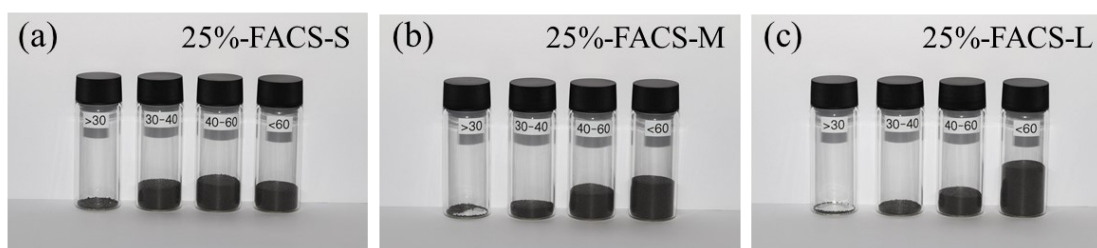

Fig. S2. Particle size distribution of (a) 25%-FACS-S, (b) 25%-FACS-M, (c) 25%-FACS-L.

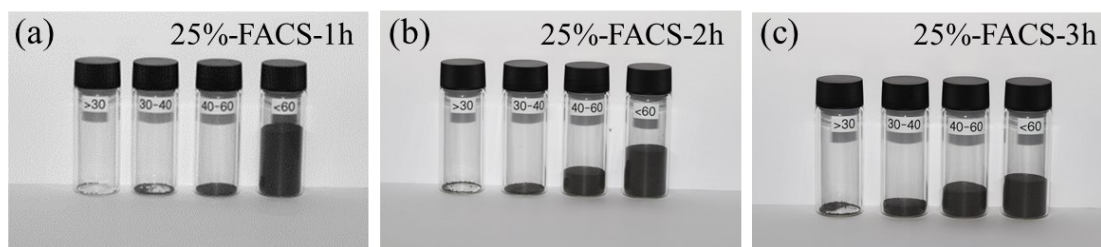

Fig. S3. Particle size distribution of (a) 25%-FACS-1h, (b) 25%-FACS-2h, (c) 25%-FACS-3h.

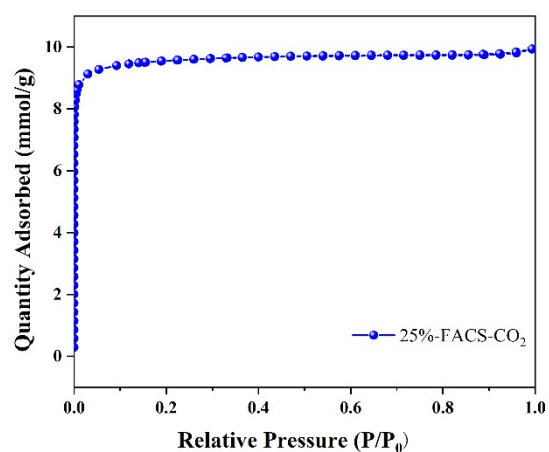

Fig. S4. N<sub>2</sub> adsorption-desorption isotherms of 25%-FACS-CO<sub>2</sub> activated by CO<sub>2</sub> under 800 °C.

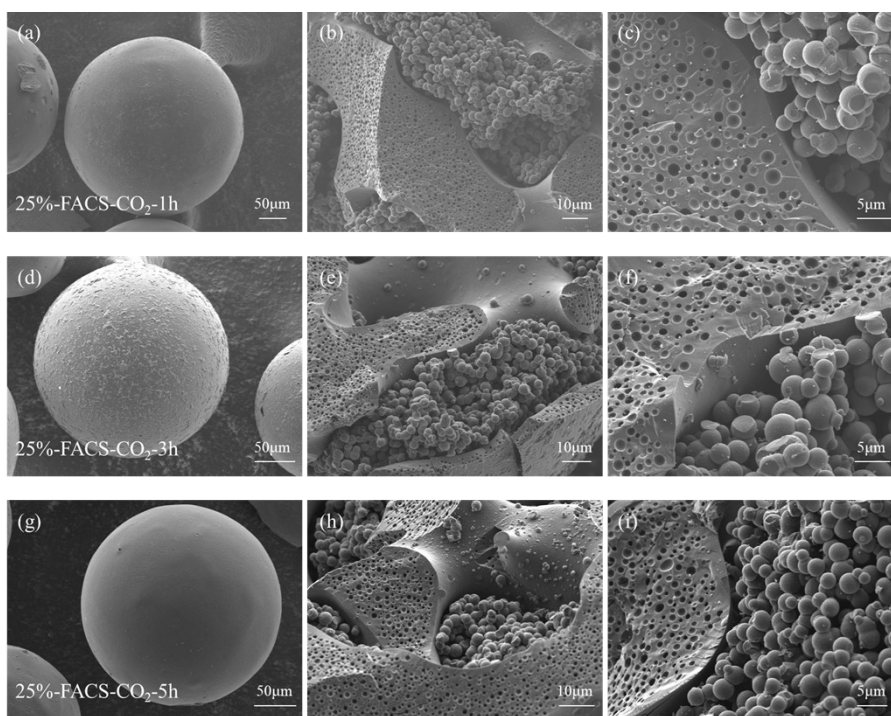

Fig. S5. SEM images of the outside and inside structure of (a, b, c) 25%-FACS-CO<sub>2</sub>-1h, (d, e, f) 25%-FACS-CO<sub>2</sub>-3h and (g, h, i) 25%-FACS-CO<sub>2</sub>-5h.

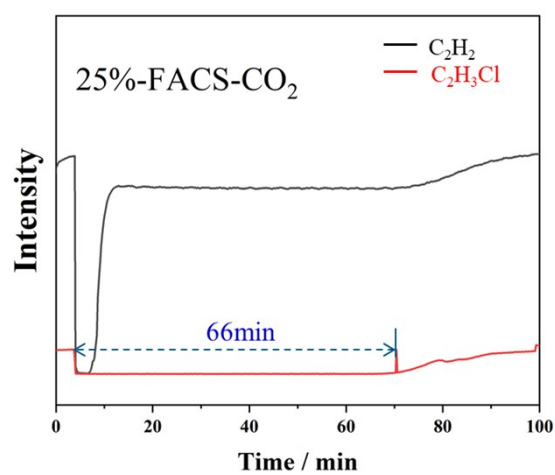

Fig. S6. Breakthrough curves of  $C_2H_3Cl$  and  $C_2H_2$  on 25%-FACS- $CO_2$

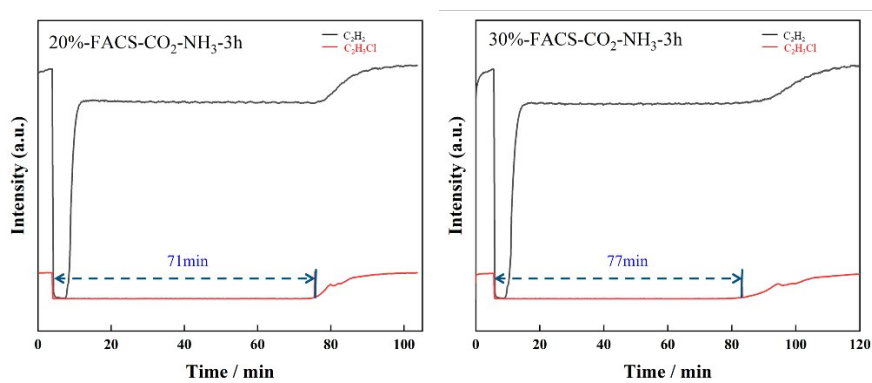

Fig. S7. Breakthrough curves of  $C_2H_3Cl$  and  $C_2H_2$  on 20%-FACS- $CO_2-NH_3-3h$  and 30%-FACS- $CO_2-NH_3-3h$

## Supplementary Tables

Table S1 BET of x%-FACS with different contents/molecular weight of PPG 2000 and 25%-FACS with different dosage of PVA

| Sample        | BET (m <sup>2</sup> /g) | Micropore area (m <sup>2</sup> /g) |
|---------------|-------------------------|------------------------------------|
| FACS          | 126                     | 123                                |
| 20%-FACS      | 188                     | 186                                |
| 25%-FACS      | 232                     | 223                                |
| 30%-FACS      | 381                     | 321                                |
| 50%-FACS      | 446                     | 412                                |
| 25%-FACS-1500 | 179                     | 174                                |
| 25%-FACS-4000 | 379                     | 347                                |
| 25%-FACS-S    | 243                     | 213                                |
| 25%-FACS-L    | 251                     | 219                                |

Table S2. Mechanical strength of x%-FACS sample

| Sample   | Crushing strength (N) |
|----------|-----------------------|
| FACS     | 67.0                  |
| 20%-FACS | 30.8                  |
| 25%-FACS | 4.25                  |
| 30%-FACS | 1.17                  |
| 50%-FACS | 0.52                  |

Table S3. C<sub>2</sub>H<sub>2</sub> adsorption performance of FACS samples

| Sample                                        | Breakthrough capacity (mmol/g) |
|-----------------------------------------------|--------------------------------|
| 25%-FACS-CO <sub>2</sub> -1h                  | 0.035                          |
| 25%-FACS-CO <sub>2</sub> -3h                  | 0.037                          |
| 25%-FACS-CO <sub>2</sub> -5h                  | 0.031                          |
| 25%-FACS-CO <sub>2</sub> -NH <sub>3</sub> -1h | 0.031                          |
| 25%-FACS-CO <sub>2</sub> -NH <sub>3</sub> -2h | 0.028                          |
| 25%-FACS-CO <sub>2</sub> -NH <sub>3</sub> -3h | 0.025                          |
| 20%-FACS-CO <sub>2</sub> -NH <sub>3</sub> -3h | 0.035                          |
| 30%-FACS-CO <sub>2</sub> -NH <sub>3</sub> -3h | 0.038                          |

Table S4. Physical properties of C<sub>2</sub>H<sub>3</sub>Cl and C<sub>2</sub>H<sub>2</sub>.

| <b>Adsorbate</b>                 | <b>Polarizability</b> | <b>Dipole moment</b> |
|----------------------------------|-----------------------|----------------------|
| C <sub>2</sub> H <sub>3</sub> Cl | 6.29                  | 1.5D                 |
| C <sub>2</sub> H <sub>2</sub>    | 3.55                  | 0                    |
